# Supplementary material for: Underlying Inborn Errors of Immunity in Patients With Evans Syndrome and Multilineage Cytopenias: A Single-Centre Analysis
Source: PubMed Central journal article supplement (PMC9152001; doi:10.3389/fimmu.2022.869033), 2022-05-17
Supplement: Table_1.pdf [file Table_1.pdf]

| Gene      | RefSeq NM_     | Coding position     | Protein          |
|-----------|----------------|---------------------|------------------|
| FAS       | NM_000043.6    | c.766G>C            | p.Glu256Gln      |
| FAS       | NM_000043.6    | c.819G>T            | p.Gln273His      |
| CTLA4     | NM_005214.4    | c.168_171delTGTG    | p.Cys58Sfs*13    |
| IKBKG     | NM_001099856.6 | c.373G>A            | p.Glu125Lys      |
| CARD11    | NM_032415.7    | c.2899C>T           | p.Arg967Cys      |
| ADA2      | NM_177405.3    | c.559A>C            | p.Thr187Pro      |
| ADA2      | NM_177405.3    | c.563T>C            | p.Leu188Pro      |
| STAT3     | NM_213662.2    | c.1973A>G           | p.Lys658Arg      |
| LIG4      | NM_001098268.2 | c.833G>A            | p.Arg278His homo |
| LRBA      | NM_001367550.1 | c.1963C>T           | p.Arg655Ter homo |
| FAS       | NM_000043.6    | c.385T>C            | p.Cys129Arg      |
| STAT3     | NM_001369512.1 | c.454C>T            | p.Arg152Trp      |
| CARD11    | NM_032415.7    | c.3025G>A           | p.Val1009Ile     |
| RAG1      | NM_001377280.1 | c.1520G>A           | p.Arg507Gln homo |
| TNFRSF13B | NM_012452.3    | c.581_582delCCinsAA | p.Ser194Ter      |
| TNFRSF13B | NM_012452.3    | c.605G>A            | p.Arg202His      |
| TNFRSF13B | NM_012452.3    | c.171G>C            | p.Gln57His       |
| CASP10    | NM_032977.4    | c.1228G>A           | p.Val410Ile      |

Coding positions of the found variants.
